# Supplementary material
Source: PubMed Central journal article supplement (PMC3623224)
Supplement: AEM.03501-12_zam999104281so1.pdf [file AEM.03501-12_zam999104281so1.pdf]

Table S1: Pathogenic and beneficial environmental isolates and clinical strains and the presence of genes and phenotypes shown to have an effect on mortality.

| Strain Name | Source | Virotype <sup>a</sup> | Bingen Group ID <sup>b</sup> | Pathogen <sup>c</sup> | Hazard ratio | Mean Survival | <i>pic</i> | <i>flmA54</i> | <i>b1432</i> | <i>iroN(2)</i> | <i>sfaD</i> | <i>focG</i> | <i>focA</i> | Total genes |
|-------------|--------|-----------------------|------------------------------|-----------------------|--------------|---------------|------------|---------------|--------------|----------------|-------------|-------------|-------------|-------------|
| OP50        | N.A.   | NonPath               | A                            | 0                     | 1.00         | 8.06          | 0          | 0             | 1            | 1              | 1           | 1           | 1           | 5           |
| NRC69       | Water  | NonPath               | D                            | 1                     | 4.08         | 4.50          | 0          | 0             | 0            | 0              | 0           | 0           | 0           | 0           |
| NRC82       | Water  | NonPath               | D                            | 1                     | 3.56         | 4.49          | 0          | 0             | 0            | 0              | 0           | 0           | 0           | 0           |
| NRC153      | Water  | NonPath               | D                            | 1                     | 3.55         | 4.08          | 0          | 0             | 0            | 0              | 0           | 0           | 0           | 0           |
| NRC410      | Fecal  | UPEC                  | B2                           | 1                     | 3.22         | 3.46          | 0          | 0             | 1            | 0              | 1           | 1           | 1           | 4           |
| NRC83       | Water  | NonPath               | B2                           | 1                     | 3.13         | 4.53          | 0          | 0             | 0            | 0              | 0           | 0           | 0           | 0           |
| NRC186      | Water  | NonPath               | D                            | 1                     | 3.12         | 4.93          | 0          | 0             | 0            | 0              | 0           | 0           | 0           | 0           |
| NRC233      | Water  | NonPath               | A                            | 1                     | 3.08         | 4.30          | 0          | 0             | 0            | 0              | 0           | 0           | 0           | 0           |
| NRC191      | Water  | NonPath               | D                            | 1                     | 3.01         | 4.62          | 0          | 0             | 0            | 0              | 0           | 0           | 0           | 0           |
| NRC423      | Fecal  | Other ExPEC           | B2                           | 1                     | 2.67         | 3.67          | 1          | 0             | 1            | 0              | 1           | 1           | 1           | 5           |
| NRC35       | Water  | UPEC                  | D                            | 1                     | 2.61         | 5.24          | 0          | 0             | 0            | 0              | 0           | 0           | 0           | 0           |
| NRC275      | Water  | NonPath               | D                            | 1                     | 2.53         | 3.73          | 1          | 0             | 0            | 0              | 1           | 1           | 1           | 4           |
| NRC50       | Water  | NonPath               | D                            | 1                     | 2.39         | 5.68          | 1          | 0             | 0            | 0              | 0           | 0           | 0           | 1           |

|        |       |             |    |   |      |      |   |   |   |   |   |   |   |   |
|--------|-------|-------------|----|---|------|------|---|---|---|---|---|---|---|---|
| NRC187 | Water | NonPath     | D  | 1 | 2.32 | 5.43 | 0 | 0 | 0 | 0 | 0 | 0 | 0 | 0 |
| NRC176 | Water | NonPath     | B2 | 1 | 2.20 | 5.09 | 0 | 0 | 0 | 0 | 0 | 0 | 0 | 0 |
| NRC353 | Water | NonPath     | B1 | 1 | 2.06 | 4.10 | 1 | 0 | 0 | 0 | 1 | 1 | 1 | 4 |
| NRC14  | Water | NonPath     | D  | 1 | 2.02 | 4.75 | 0 | 0 | 0 | 0 | 0 | 0 | 0 | 0 |
| NRC37  | Water | NonPath     | B2 | 1 | 1.94 | 6.54 | 0 | 0 | 0 | 0 | 0 | 0 | 0 | 0 |
| NRC517 | Fecal | UPEC        | B2 | 1 | 1.86 | 5.53 | 0 | 0 | 1 | 0 | 1 | 1 | 1 | 4 |
| NRC202 | Water | NonPath     | D  | 1 | 1.85 | 5.64 | 0 | 0 | 0 | 0 | 0 | 0 | 0 | 0 |
| NRC354 | Water | NonPath     | D  | 1 | 1.75 | 5.00 | 1 | 0 | 0 | 0 | 1 | 1 | 1 | 4 |
| NRC225 | Water | aEPEC       | B2 | 1 | 1.74 | 5.43 | 0 | 0 | 0 | 0 | 0 | 0 | 0 | 0 |
| NRC77  | Water | NonPath     | D  | 1 | 1.71 | 7.08 | 0 | 0 | 0 | 0 | 0 | 0 | 0 | 0 |
| NRC212 | Water | NonPath     | B1 | 1 | 1.70 | 5.90 | 1 | 0 | 0 | 0 | 0 | 0 | 0 | 1 |
| NRC199 | Water | NonPath     | B1 | 1 | 1.69 | 5.67 | 0 | 0 | 0 | 0 | 0 | 0 | 0 | 0 |
| NRC194 | Water | NonPath     | D  | 1 | 1.66 | 5.53 | 0 | 0 | 0 | 0 | 0 | 0 | 0 | 0 |
| NRC205 | Water | NonPath     | B2 | 1 | 1.63 | 5.76 | 0 | 0 | 0 | 0 | 0 | 0 | 0 | 0 |
| NRC1   | Water | Other ExPEC | B2 | 1 | 1.61 | 6.28 | 1 | 0 | 1 | 0 | 1 | 1 | 1 | 5 |
| NRC149 | Water | UPEC        | B2 | 1 | 1.60 | 5.85 | 0 | 0 | 0 | 0 | 1 | 1 | 1 | 3 |
| NRC221 | Water | NonPath     | D  | 1 | 1.57 | 6.36 | 0 | 0 | 0 | 0 | 0 | 0 | 0 | 0 |
| NRC179 | Water | NonPath     | B2 | 1 | 1.56 | 5.60 | 0 | 0 | 0 | 0 | 0 | 0 | 0 | 0 |
| NRC2   | Water | UPEC        | B2 | 1 | 1.56 | 6.52 | 1 | 0 | 1 | 0 | 1 | 1 | 1 | 5 |
| NRC7   | Water | NonPath     | D  | 1 | 1.53 | 5.37 | 0 | 0 | 0 | 0 | 0 | 0 | 0 | 0 |
| NRC34  | Water | Other ExPEC | B2 | 1 | 1.52 | 7.41 | 0 | 0 | 0 | 0 | 1 | 0 | 0 | 1 |
| NRC8   | Water | NonPath     | D  | 1 | 1.52 | 5.46 | 0 | 0 | 0 | 0 | 0 | 0 | 0 | 0 |

|        |       |         |      |   |      |       |   |   |   |   |   |   |   |   |
|--------|-------|---------|------|---|------|-------|---|---|---|---|---|---|---|---|
| NRC364 | Fecal | UPEC    | D    | 1 | 1.49 | 5.48  | 0 | 0 | 0 | 0 | 0 | 0 | 0 | 0 |
| NRC164 | Water | NonPath | B1   | 1 | 1.43 | 6.28  | 0 | 0 | 1 | 0 | 0 | 0 | 0 | 1 |
| NRC43  | Water | NonPath | D    | 1 | 1.41 | 6.85  | 0 | 0 | 0 | 0 | 0 | 0 | 0 | 0 |
| NRC197 | Water | NonPath | D    | 1 | 1.37 | 6.27  | 0 | 0 | 0 | 0 | 0 | 0 | 0 | 0 |
| NRC41  | Water | NonPath | D    | 1 | 1.35 | 7.79  | 0 | 0 | 0 | 0 | 0 | 0 | 0 | 0 |
| NRC214 | Water | NonPath | D    | 1 | 1.35 | 6.73  | 0 | 0 | 1 | 0 | 0 | 0 | 0 | 1 |
| NRC162 | Water | UPEC    | A    | 1 | 1.34 | 6.26  | 0 | 0 | 1 | 0 | 1 | 0 | 0 | 2 |
| NRC203 | Water | NonPath | D    | 1 | 1.33 | 6.47  | 0 | 0 | 0 | 0 | 0 | 0 | 0 | 0 |
| NRC281 | Water | NonPath | B2-1 | 1 | 1.27 | 7.04  | 1 | 0 | 0 | 0 | 1 | 1 | 1 | 4 |
| NRC216 | Water | NonPath | B2   | 0 | 0.77 | 8.33  | 0 | 0 | 0 | 0 | 0 | 0 | 0 | 0 |
| NRC72  | Water | NonPath | D    | 0 | 0.77 | 11.38 | 0 | 0 | 0 | 0 | 0 | 0 | 0 | 0 |
| NRC29  | Water | NonPath | B2-1 | 0 | 0.76 | 8.96  | 1 | 0 | 0 | 1 | 1 | 1 | 1 | 5 |
| NRC9   | Water | NonPath | B1   | 0 | 0.76 | 10.63 | 0 | 0 | 0 | 1 | 0 | 0 | 0 | 1 |
| NRC166 | Water | NonPath | B1   | 0 | 0.76 | 10.47 | 0 | 0 | 0 | 0 | 0 | 0 | 0 | 0 |
| NRC23  | Water | NonPath | B2   | 0 | 0.75 | 9.80  | 0 | 0 | 0 | 0 | 0 | 0 | 0 | 0 |
| NRC156 | Water | NonPath | B1   | 0 | 0.75 | 9.02  | 0 | 0 | 0 | 0 | 0 | 0 | 0 | 0 |
| NRC67  | Water | NonPath | B2   | 0 | 0.74 | 10.93 | 0 | 0 | 0 | 0 | 0 | 0 | 0 | 0 |
| NRC42  | Water | NonPath | D    | 0 | 0.73 | 10.46 | 0 | 0 | 0 | 1 | 0 | 0 | 0 | 1 |
| NRC155 | Water | NonPath | B1   | 0 | 0.72 | 10.16 | 0 | 0 | 0 | 0 | 0 | 0 | 0 | 0 |
| NRC60  | Water | NonPath | D    | 0 | 0.72 | 11.80 | 0 | 0 | 0 | 0 | 0 | 0 | 0 | 0 |
| NRC30  | Water | NonPath | D    | 0 | 0.71 | 8.48  | 0 | 0 | 0 | 0 | 0 | 0 | 0 | 0 |
| NRC218 | Water | NonPath | D    | 0 | 0.71 | 8.71  | 0 | 0 | 0 | 0 | 0 | 0 | 0 | 0 |

|        |       |         |    |   |      |       |   |   |   |   |   |   |   |   |
|--------|-------|---------|----|---|------|-------|---|---|---|---|---|---|---|---|
| NRC167 | Water | NonPath | A  | 0 | 0.70 | 9.63  | 0 | 0 | 0 | 0 | 0 | 0 | 0 | 0 |
| NRC148 | Water | NonPath | B2 | 0 | 0.70 | 10.13 | 0 | 0 | 0 | 0 | 0 | 0 | 0 | 0 |
| NRC174 | Water | NonPath | D  | 0 | 0.68 | 10.12 | 0 | 0 | 0 | 0 | 0 | 0 | 0 | 0 |
| NRC73  | Water | NonPath | D  | 0 | 0.68 | 11.46 | 0 | 0 | 0 | 0 | 0 | 0 | 0 | 0 |
| NRC66  | Water | NonPath | B2 | 0 | 0.68 | 11.26 | 0 | 0 | 0 | 0 | 0 | 0 | 0 | 0 |
| NRC27  | Water | NonPath | D  | 0 | 0.68 | 9.52  | 0 | 0 | 0 | 0 | 0 | 0 | 0 | 0 |
| NRC229 | Water | NonPath | D  | 0 | 0.67 | 8.92  | 0 | 1 | 0 | 0 | 0 | 0 | 0 | 1 |
| NRC63  | Water | NonPath | D  | 0 | 0.67 | 12.26 | 0 | 0 | 0 | 1 | 0 | 0 | 0 | 1 |
| NRC62  | Water | NonPath | D  | 0 | 0.66 | 11.42 | 0 | 0 | 0 | 0 | 0 | 0 | 0 | 0 |
| NRC173 | Water | NonPath | D  | 0 | 0.60 | 10.50 | 0 | 0 | 0 | 0 | 0 | 0 | 0 | 0 |
| NRC70  | Water | NonPath | B2 | 0 | 0.58 | 13.58 | 0 | 1 | 0 | 0 | 0 | 0 | 0 | 1 |
| NRC163 | Water | NonPath | B2 | 0 | 0.58 | 10.54 | 0 | 0 | 0 | 0 | 0 | 0 | 0 | 0 |
| NRC161 | Water | NonPath | B1 | 0 | 0.57 | 11.84 | 0 | 0 | 0 | 0 | 0 | 0 | 0 | 0 |
| NRC219 | Water | NonPath | B1 | 0 | 0.57 | 7.96  | 0 | 1 | 0 | 0 | 0 | 0 | 0 | 1 |
| NRC245 | Water | NonPath | B2 | 0 | 0.52 | 12.69 | 0 | 1 | 0 | 0 | 0 | 0 | 0 | 1 |
| NRC207 | Water | NonPath | D  | 0 | 0.52 | 11.27 | 0 | 0 | 0 | 0 | 0 | 0 | 0 | 0 |
| NRC25  | Water | NonPath | D  | 0 | 0.51 | 11.22 | 0 | 0 | 0 | 0 | 0 | 0 | 0 | 0 |
| NRC226 | Water | NonPath | A  | 0 | 0.50 | 10.75 | 0 | 0 | 0 | 0 | 0 | 0 | 0 | 0 |
| NRC235 | Water | NonPath | D  | 0 | 0.48 | 10.28 | 0 | 1 | 0 | 0 | 0 | 0 | 0 | 1 |
| NRC46  | Water | NonPath | D  | 0 | 0.47 | 12.93 | 0 | 0 | 0 | 0 | 0 | 0 | 0 | 0 |
| NRC13  | Water | NonPath | B1 | 0 | 0.47 | 11.09 | 0 | 1 | 0 | 0 | 0 | 0 | 0 | 1 |
| NRC40  | Water | NonPath | D  | 0 | 0.43 | 14.36 | 0 | 0 | 0 | 0 | 0 | 0 | 0 | 0 |

|            |      |      |    |   |      |       |                                  |   |    |    |    |    |    |    |    |
|------------|------|------|----|---|------|-------|----------------------------------|---|----|----|----|----|----|----|----|
| 536        | N.A. | UPEC | B2 | 1 | 3.93 | 3.07  | 0                                | 0 | 1  | 0  | 1  | 1  | 1  | 4  |    |
| H84        | N.A. | EIEC | B2 | 1 | 2.15 | 4.71  | 0                                | 0 | 1  | 0  | 0  | 1  | 1  | 3  |    |
| H10407     | N.A. | ETEC | A  | 1 | 1.99 | 4.95  | 0                                | 1 | 0  | 0  | 0  | 0  | 0  | 1  |    |
| E2348/69   | N.A. | EPEC | B2 | 1 | 1.65 | 5.64  | 0                                | 0 | 0  | 0  | 0  | 0  | 0  | 0  |    |
| CFT073     | N.A. | UPEC | B2 | 0 | 0.89 | 8.97  | 1                                | 0 | 1  | 1  | 1  | 1  | 1  | 6  |    |
| EDL933     | N.A. | EHEC | D  | 0 | 0.71 | 10.69 | 1                                | 1 | 0  | 1  | 1  | 1  | 1  | 5  |    |
| 17-2       | N.A. | EAEC | B2 | 0 | 0.70 | 10.84 | 0                                | 1 | 1  | 1  | 0  | 1  | 0  | 4  |    |
| ATCC 25922 | N.A. | UPEC | B2 | 0 | 0.66 | 11.09 | 1                                | 0 | 1  | 1  | 1  | 1  | 1  | 6  |    |
|            |      |      |    |   |      |       | # of isolates                    |   | 17 | 17 | 11 | 31 | 17 | 14 | 14 |
|            |      |      |    |   |      |       | Impact on mortality <sup>d</sup> |   | +  | -  | +  | +  | +  | +  | +  |

- a. Putative intestinal and extra-intestinal virotypes were identified by microarray using the criteria of Johnson *et al.* (41) and Hamelin *et al.* (34).
- b. Bingen groups or phylotype based on multiplex PCR were identified as described by Clermont *et al.* (19).
- c. An isolate was considered pathogenic (1) when the hazard ratio, calculated by CPH, was significantly higher than 1, or OP50. All non-pathogenic (0) isolates tabulated were significantly less than 1.
- d. The impact on mortality for each gene was determined by CPH for environmental isolates alone. + indicates a significant enhancement in mortality - indicates a significant decreased in mortality.
